# Supplementary material for: Pressure Point Threshold and ME/CFS comorbidity as Indicators of Physiotherapy Response in Fibromyalgia
Source: Preprints.org preprint supplement (doi:10.20944/preprints202009.0264.v1), 2020-09-12
Supplement: Supplementary file 1 [file supplementary:Supplementary%20Figure%20S1.pdf]

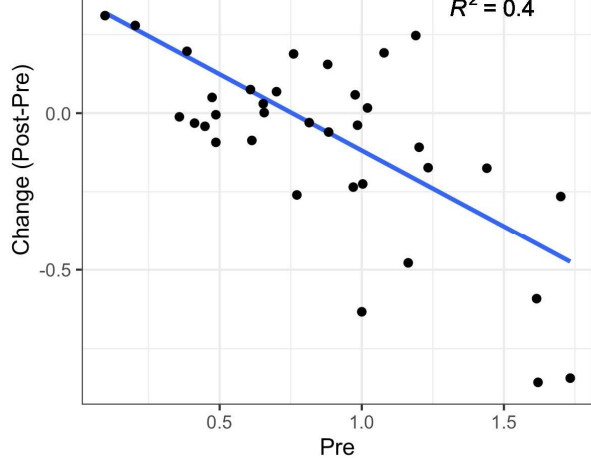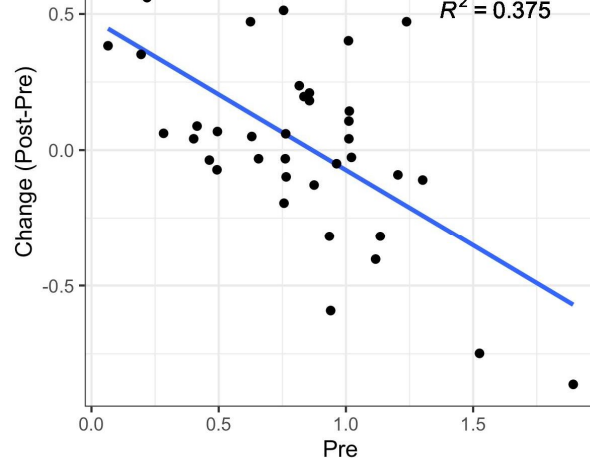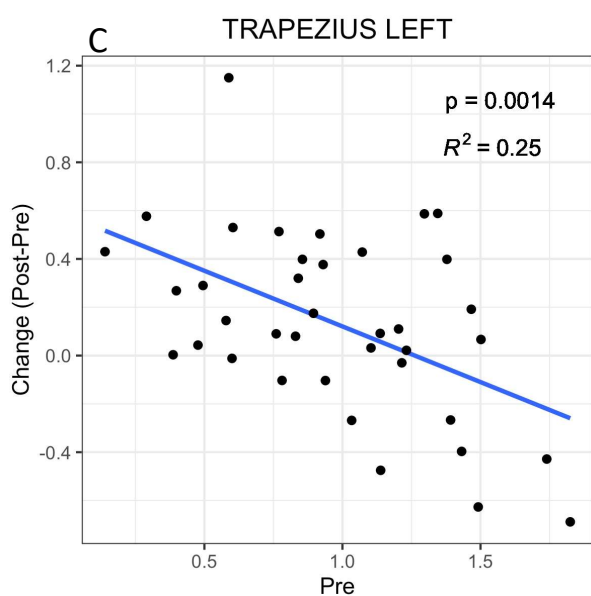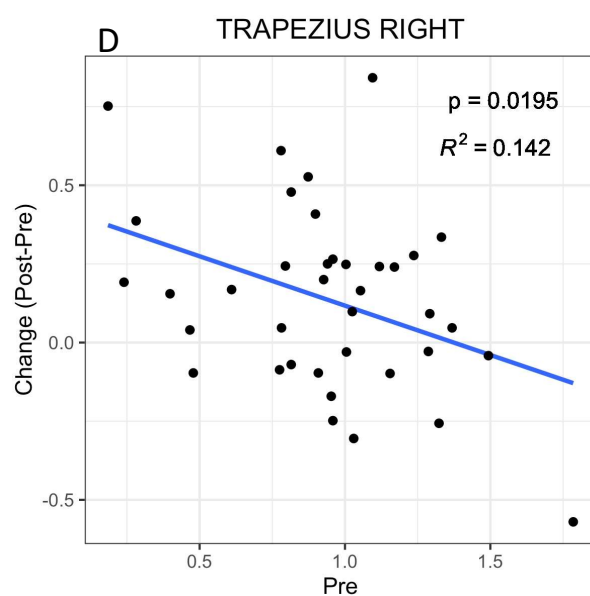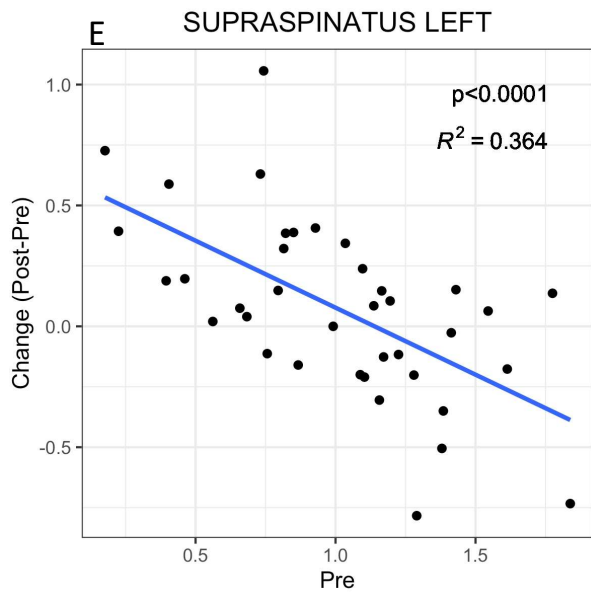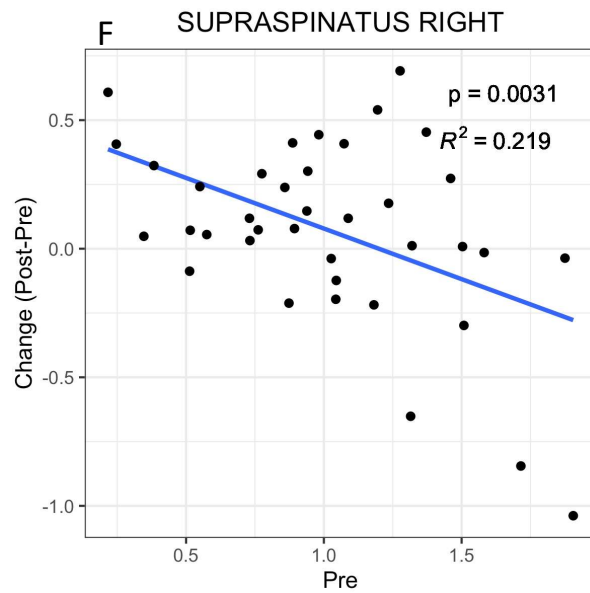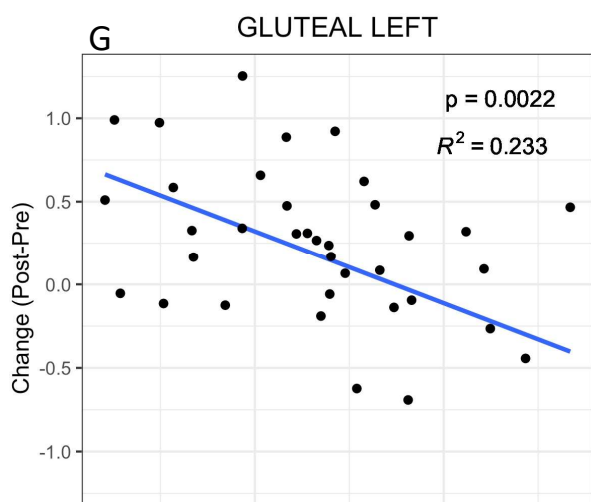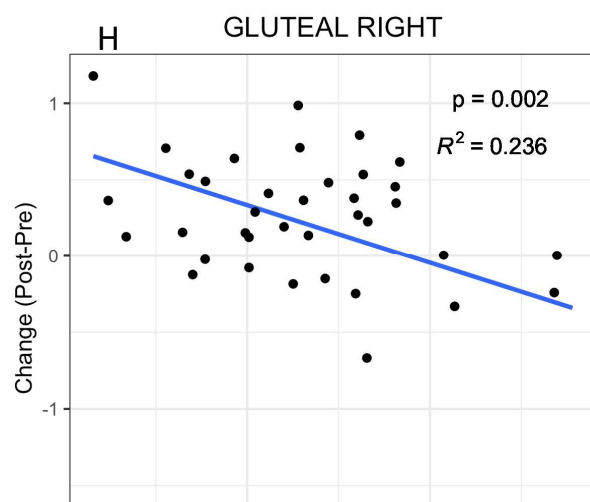

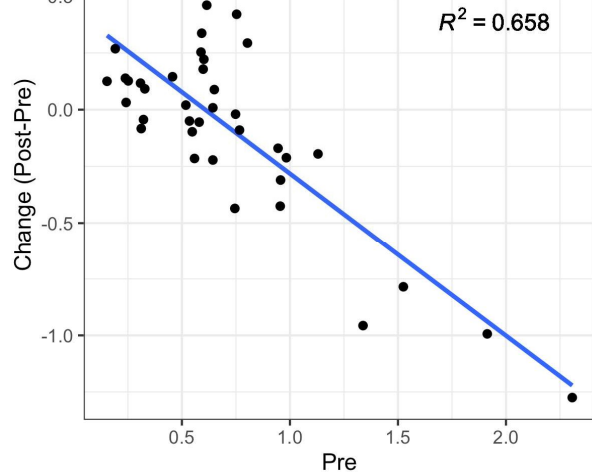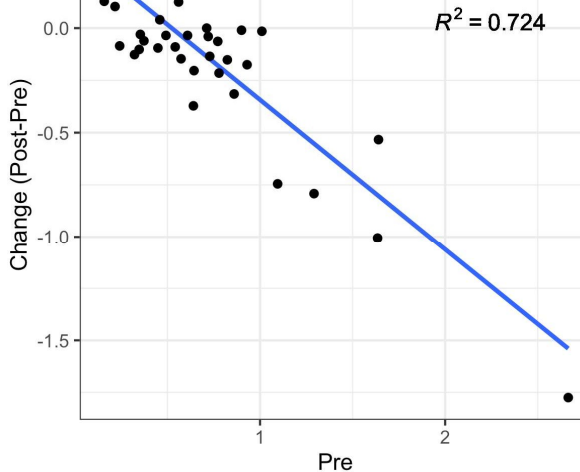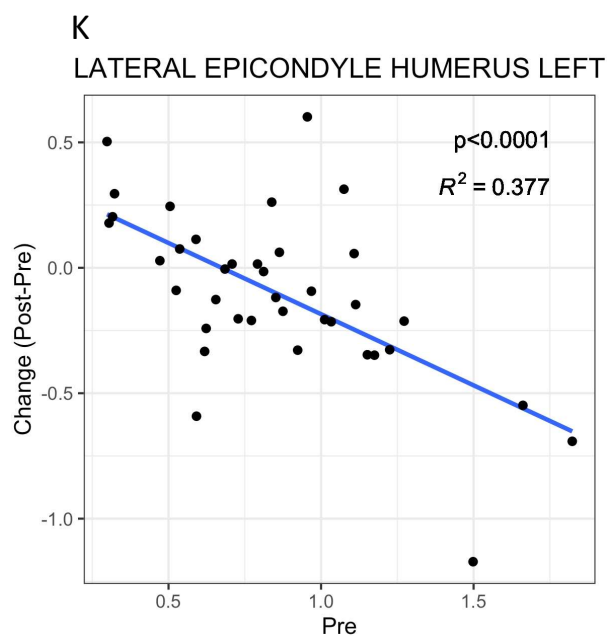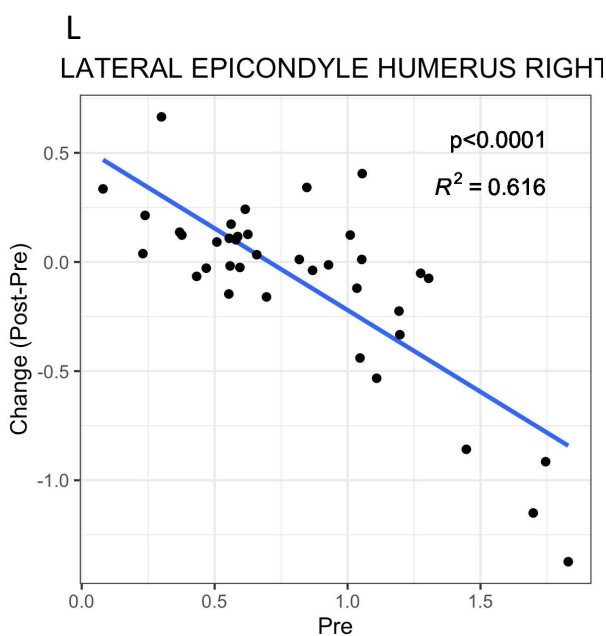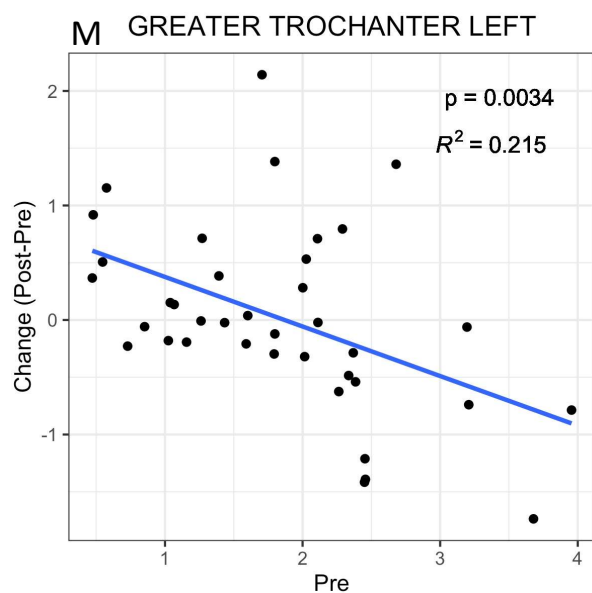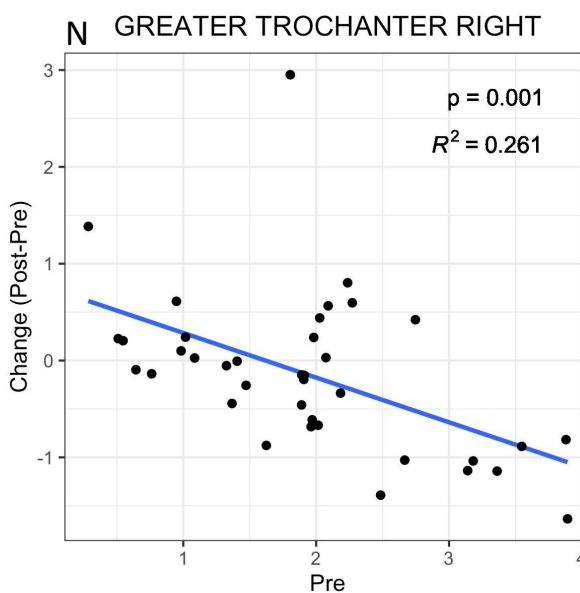

**Supplementary Figure S1.** Linear dependence of PPT baseline scores with MT therapy response. The plots show the inverse correlation between pre-treatment PPT values and the improvement measured as the acquired resistance to pressure-induced pain for the tenderpoints (Change: Post-Pre) at the indicated tender points (A-N). P and R2 values are shown.
