# Supplementary material for: Pressure Point Threshold and ME/CFS comorbidity as Indicators of Physiotherapy Response in Fibromyalgia
Source: Preprints.org preprint supplement (doi:10.20944/preprints202009.0264.v1), 2020-09-12
Supplement: Supplementary file 2 [file supplementary:Supplementary%20Figure%20S2.pdf]

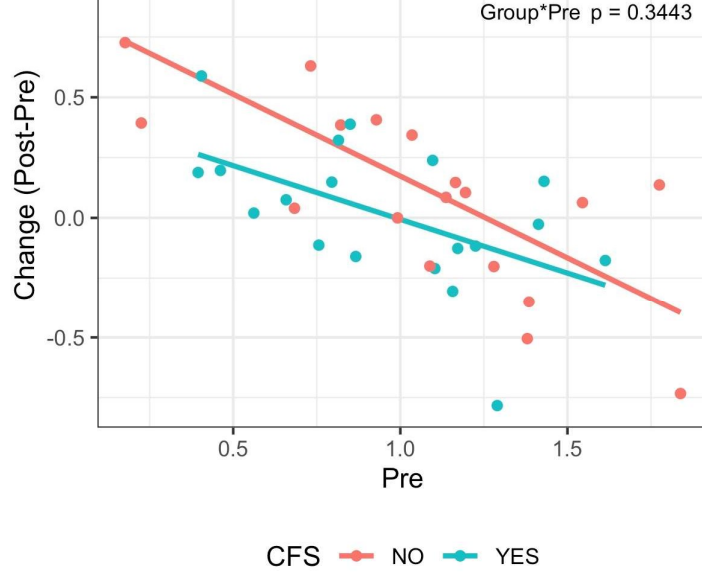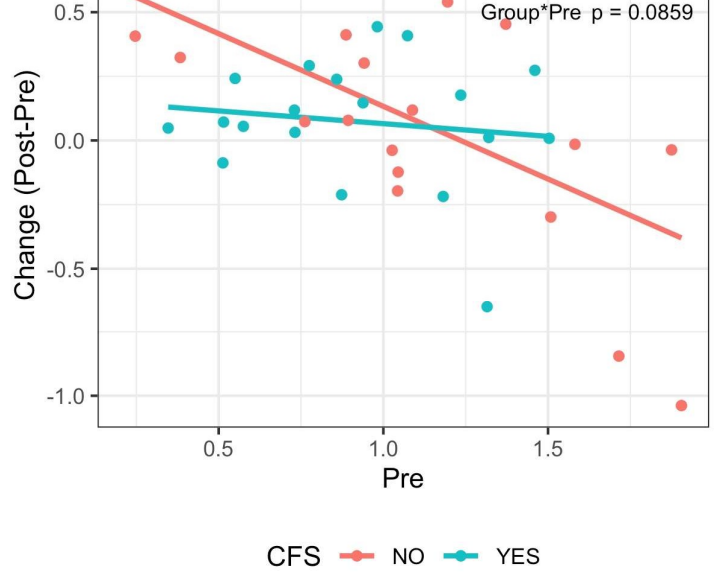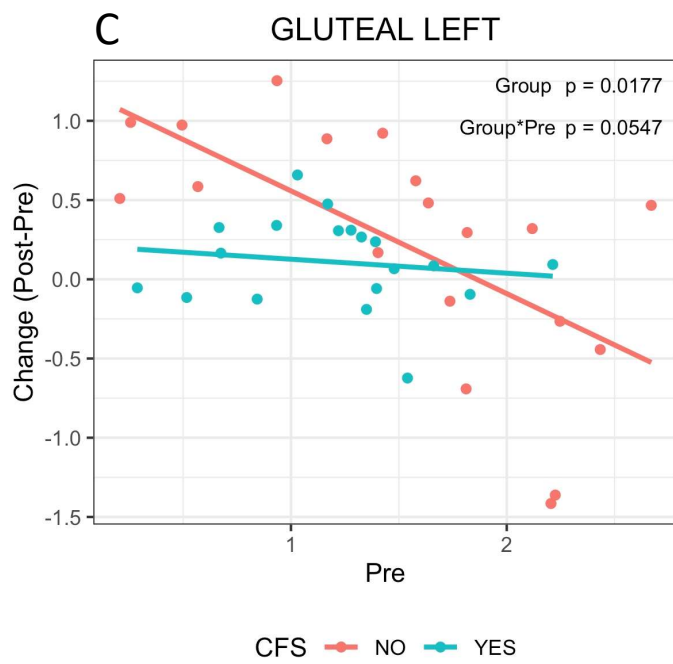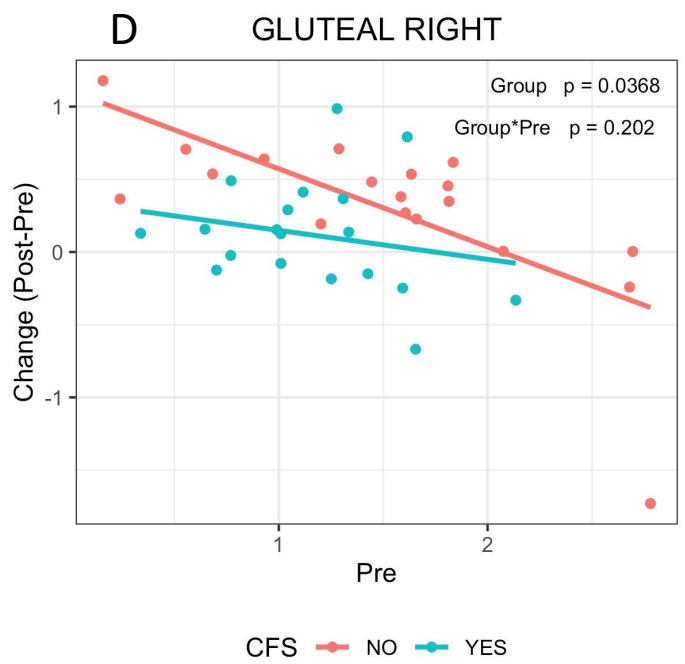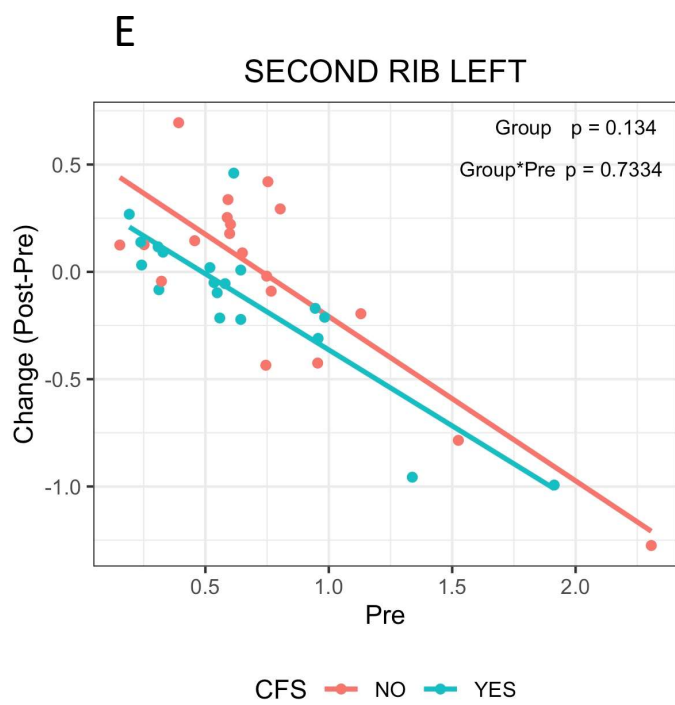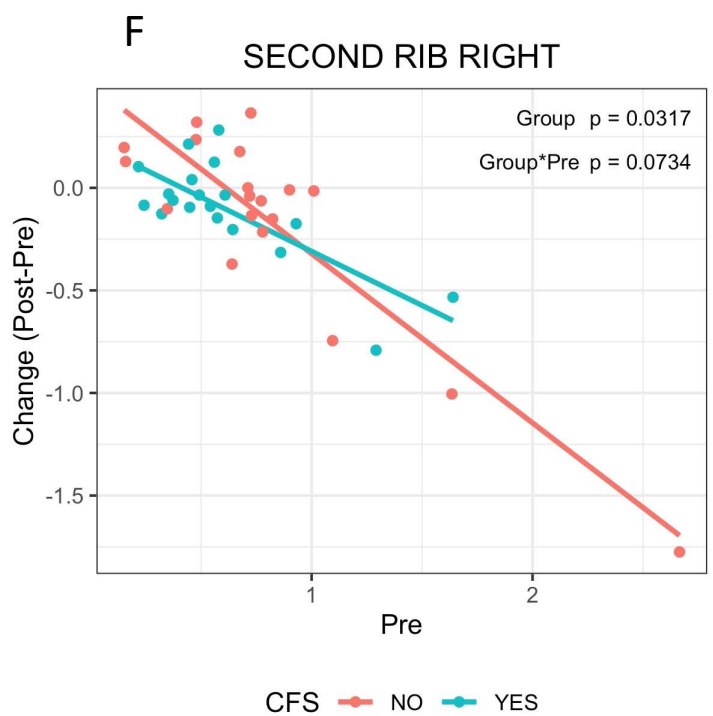

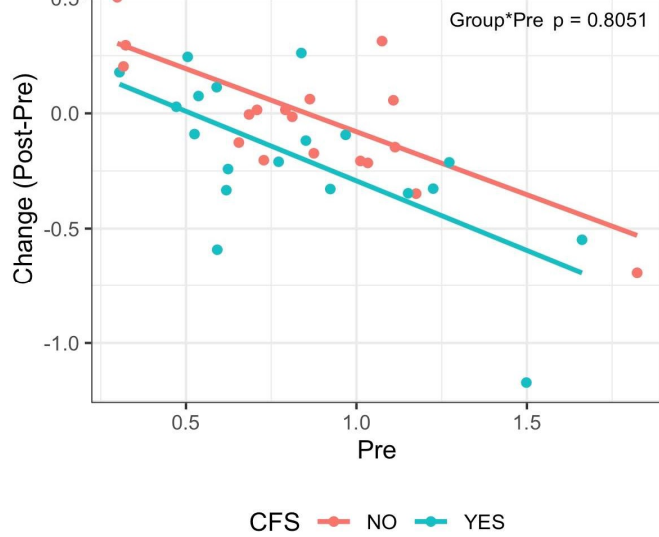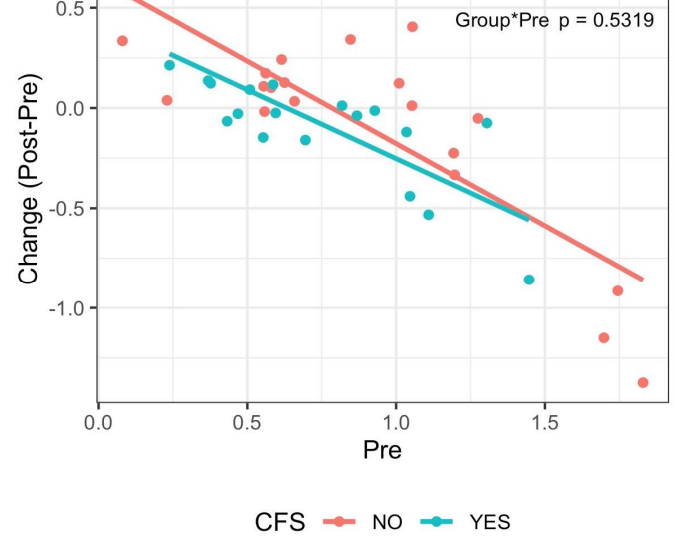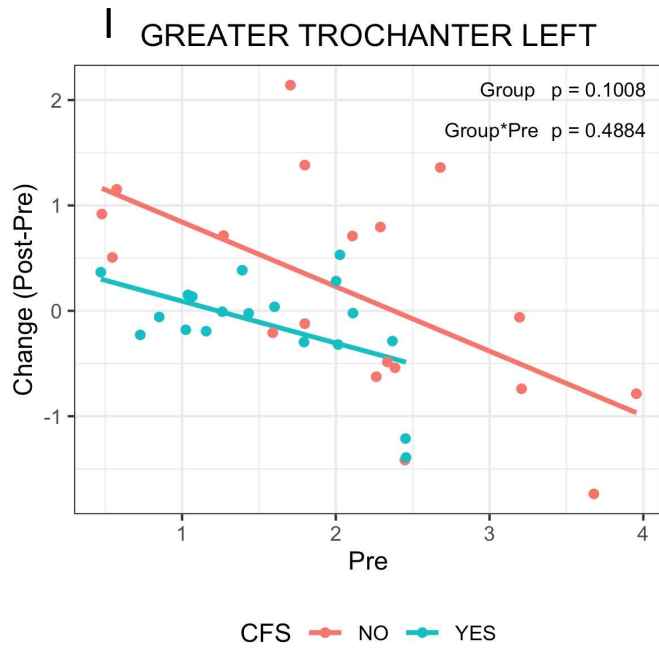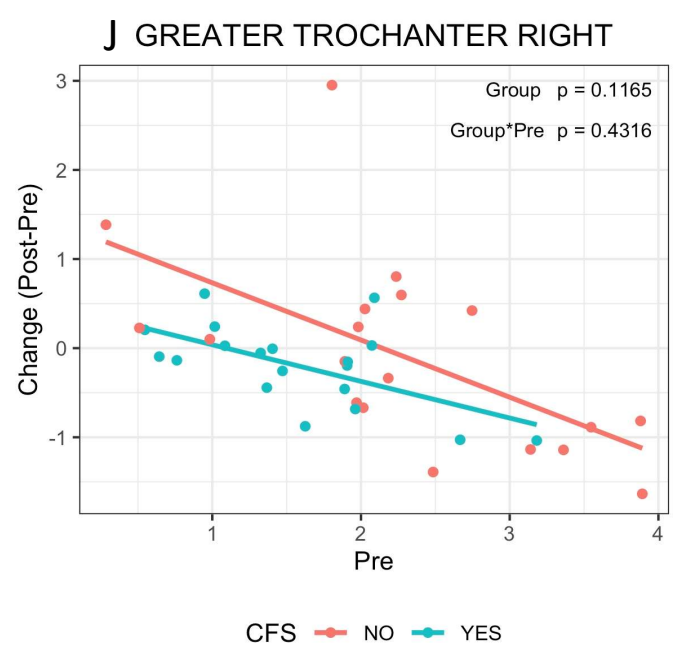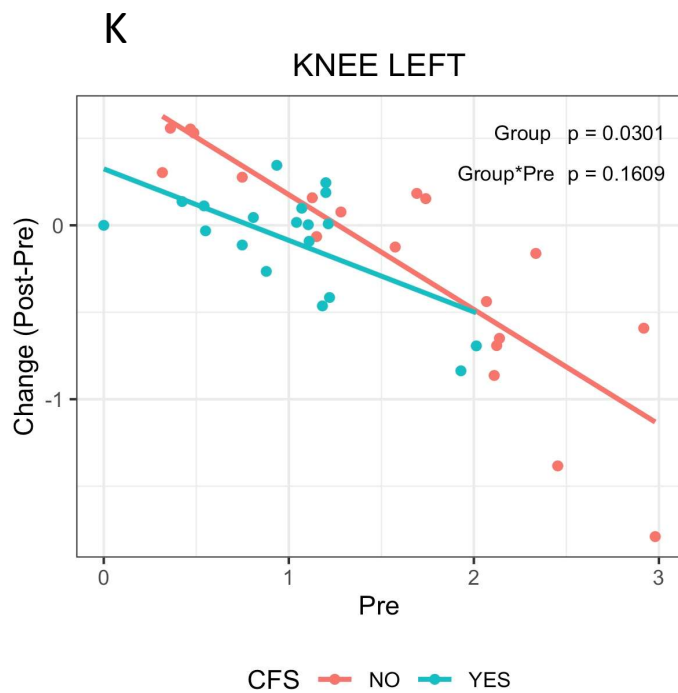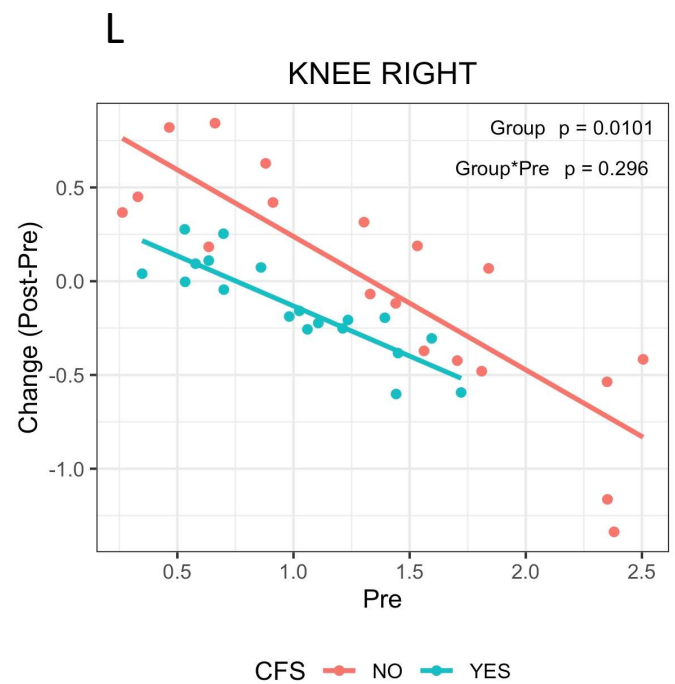

**Supplementary Figure S2.** Linear dependence of PPT baseline scores (*Pre*) with MT therapy response (*Change: Post-Pre*) in patients presenting FM with or without comorbid ME/CFS. The plots show the inverse correlation between pre-treatment PPT values and symptom improvement, measured as the acquired resistance to pressure-induced pain for the tenderpoints indicated (A-L). Linear adjustments in the FM only subgroup are shown in red color, while those for the FM patients that present with ME/CFS comorbidity are shown in green. P values of the differences between FM only and FM with ME/CFS are
